# Supplementary material for: Alternating pulse approach for electrochemical production of struvite as an option for phosphorous recovery from wastewater
Source: Royal Society of Chemistry journal article supplement (doi:10.1039/d5ra02880a), 2025-01-01

## Supplementary information

### Alternating pulse approach for electrochemical production of struvite as an alternative for phosphorous recovery

Enrique Rodriguez Nuñez<sup>a</sup>, Guadalupe Aguilar Vázquez<sup>b</sup>, Adrian Sosa<sup>a</sup>, Rufino Nava<sup>c</sup> and Arely Cardenas<sup>d</sup>

SI1. Scheme of the set up in the electrochemical cell for the measurement of potential in the working electrode, by accoupling a reference electrode and a multimeter

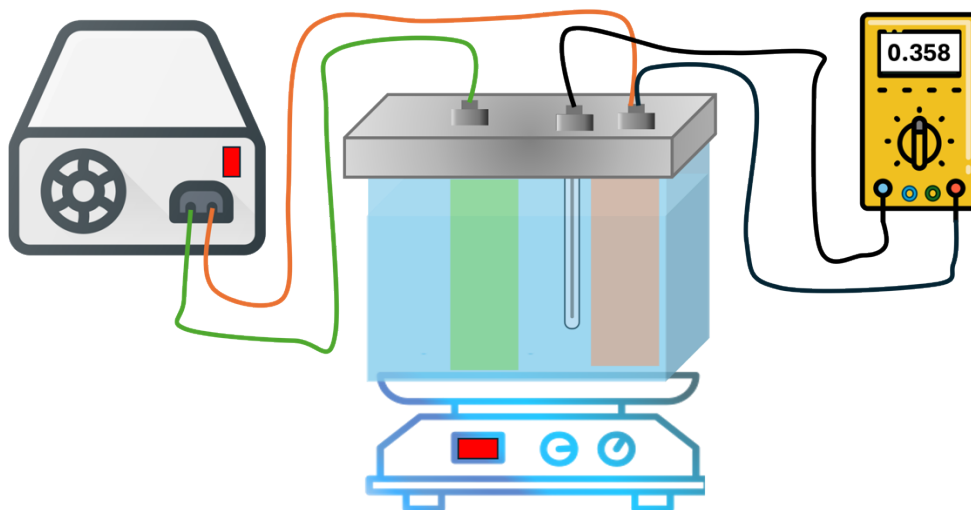

SI2. Images of the different stages and changes observed in the working during the linear voltammetry. A. Bubbling zone, small bubbles are formed in the surface of the working electrode. B. Change from a smooth surface to an irregular. C. Formation of a white film in the electrodes surface.

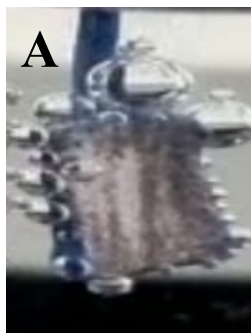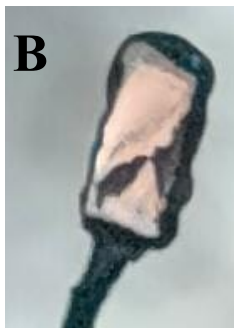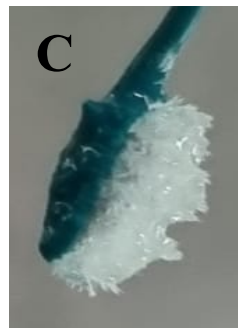

SI3. Correlation of applied current and Electrical consumption in the system

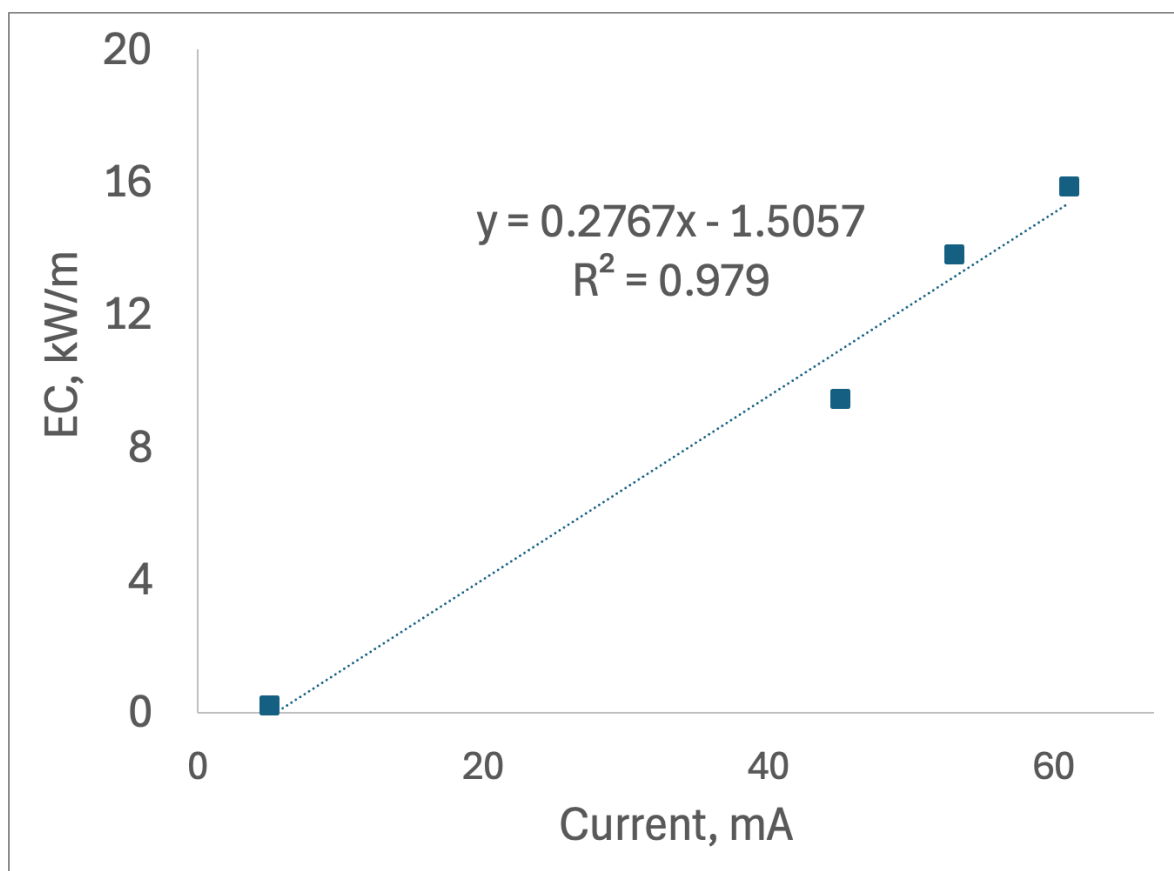

SI4.A One-way ANOVA for difference of means using a Tukey's test with 95% of confidence.

| i, mA       | n | Mean               |                       | Group              |                       |
|-------------|---|--------------------|-----------------------|--------------------|-----------------------|
|             |   | N- $\text{NH}_4^+$ | P- $\text{PO}_4^{3-}$ | N- $\text{NH}_4^+$ | P- $\text{PO}_4^{3-}$ |
| 5           | 4 | 69.43              | 78.88                 | A                  | A                     |
| 45          | 4 | 34.55              | 26.69                 | B                  | B                     |
| 53          | 4 | 21.04              | 23.17                 | B C                | B                     |
| 61          | 4 | 19.15              | 9.15                  | C                  | C                     |
| Mean square |   | 2721.12            | 3735.80               |                    |                       |
| F ratio     |   | 224.06             | 593.88                |                    |                       |

\*Indicates that there is not a significant difference

SI4.B. ANOVA analysis with 95% of confidence N-  $\text{NH}_4^+$

| Source         | Sum of Squares | Df | Mean Square | F-Ratio | P-Value |
|----------------|----------------|----|-------------|---------|---------|
| Between groups | 8163.37        | 3  | 2721.12     | 224.06  | 0.0000  |
| Within groups  | 145.737        | 12 | 12.1447     |         |         |
| Total (Corr.)  | 8309.1         | 15 |             |         |         |

Means and 95.0 Percent LSD Intervals

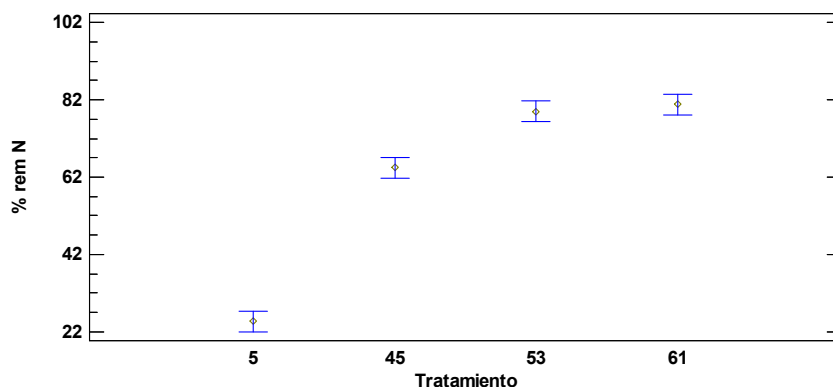

SI4.C. ANOVA analysis with 95% of confidence P-  $\text{PO}_4^{3-}$

| Source         | Sum of Squares | Df | Mean Square | F-Ratio | P-Value |
|----------------|----------------|----|-------------|---------|---------|
| Between groups | 11207.4        | 3  | 3735.8      | 593.88  | 0.0000  |
| Within groups  | 75.4863        | 12 | 6.29053     |         |         |
| Total (Corr.)  | 11282.9        | 15 |             |         |         |

Means and 95.0 Percent LSD Intervals

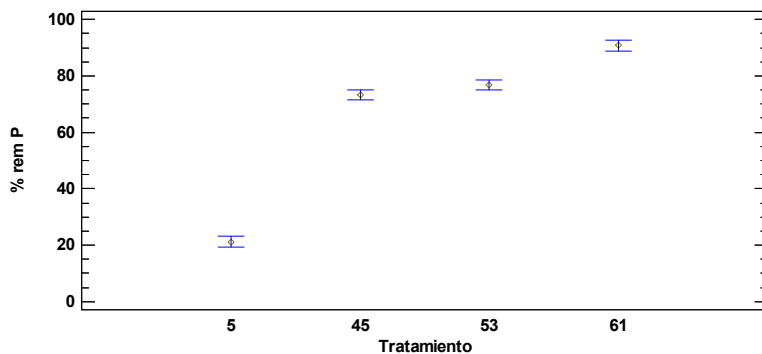

SI 5. Linear regression of concentration of  $(\text{PO}_4)^{3-}$  as  $\text{NaH}_2\text{PO}_4$  vs absorbance and ammonia as  $\text{NH}_4\text{Cl}$  vs absorbance.

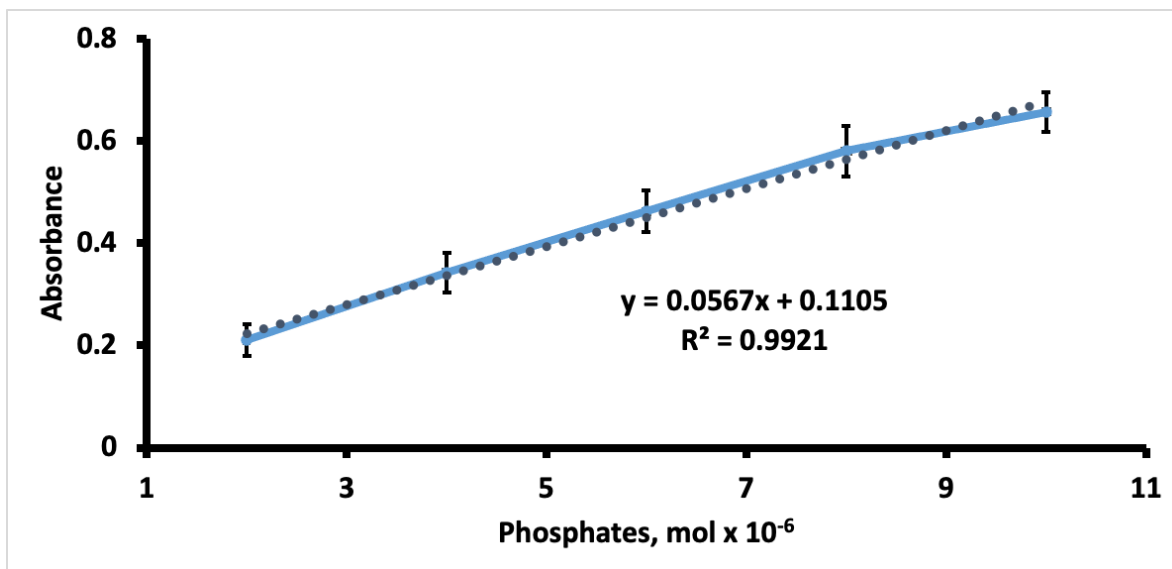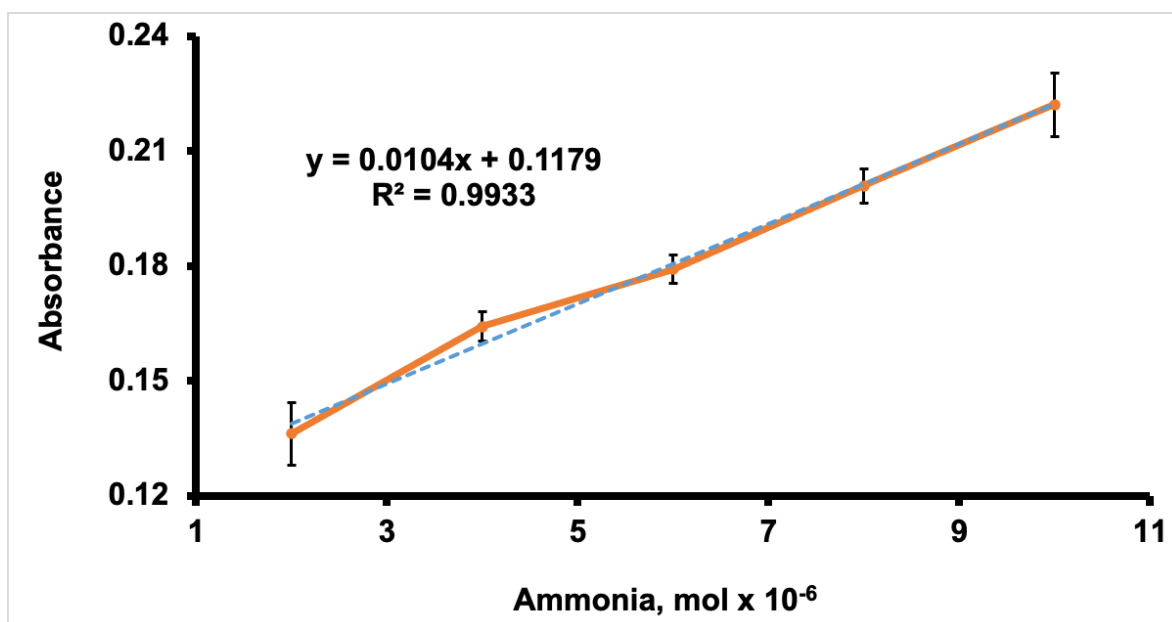

Supplement: d5ra02880a1.pdf [file d5ra02880a1.pdf]
